# Supplementary material
Source: PubMed Central journal article supplement (PMC6459113)

## Supplementary Online Content

Kang EY-C, Chen T-H, Garg SJ, et al. Association of statin therapy with prevention of vision-threatening diabetic retinopathy. *JAMA Ophthalmol*. Published online January 10, 2019. doi:10.1001/jamaophthalmol.2018.6399

**eTable 1.** ICD-9-CM Codes of Diagnoses Used for Defining the Population, Comorbidities, and Outcomes

**eTable 2.** Anatomical Therapeutic Chemical (ATC) Codes of the Medications Used in This Study

**eTable 3.** Demographic Information of the Study Population before Propensity Score Matching

**eTable 4.** The Effect of Statin on Diabetic Retinopathy in Patients with Type 2 Diabetes Mellitus by Intensity

**eFigure 1.** Cumulative Incidence of All Diabetic Retinopathy With Low-, Moderate-, and High-Intensity Statin Therapy

**eFigure 2.** Distribution of the Index Date in the Statin and Nonstatin Groups After Propensity Score Matching

This supplementary material has been provided by the authors to give readers additional information about their work.

**eTable 1. ICD-9-CM Codes of Diagnoses Used for Defining the Population, Comorbidities, and Outcomes**

| Diagnosis                       | ICD-9-CM Code                                                                                                                                                  |
|---------------------------------|----------------------------------------------------------------------------------------------------------------------------------------------------------------|
| <b>Select study cohort</b>      |                                                                                                                                                                |
| Diabetes mellitus               | 250.xx and any oral hypoglycemic drugs or insulin                                                                                                              |
| Type 1 diabetes                 | 250.01, 250.03, 250.11, 250.13, 250.21, 250.23, 250.31, 250.33, 250.41, 250.43, 250.51, 250.53, 250.61, 250.63, 250.71, 250.73, 250.81, 250.83, 250.91, 250.93 |
| Other background retinopathy    | 362.1x                                                                                                                                                         |
| Other proliferative retinopathy | 362.2x                                                                                                                                                         |
| Retinal vascular occlusion      | 362.3x                                                                                                                                                         |
| Separation of retinal layer     | 361.xx, 362.4x                                                                                                                                                 |
| Degeneration of retina          | 362.5x, 362.6x, 362.7x                                                                                                                                         |
| Chorioretinal inflammation      | 363.0x, 363.1x, 363.2x                                                                                                                                         |
| Other retinal disorder          | 362.8x, 379.23                                                                                                                                                 |
| Liver cirrhosis                 | 571.2, 571.5, 571.6 (with catastrophic illness card)                                                                                                           |
| <b>Primary outcomes</b>         |                                                                                                                                                                |
| Diabetic retinopathy            | 362.0x                                                                                                                                                         |
| Non-proliferative DR            | 362.01, 362.03, 362.04, 362.05, 362.06                                                                                                                         |
| Proliferative DR                | 362.02                                                                                                                                                         |
| Vitreous hemorrhage             | 379.23, 362.81                                                                                                                                                 |
| Tractional retinal detachment   | 361.0x, 361.8x, 361.9                                                                                                                                          |
| Diabetic macular edema          | 362.07, 362.53                                                                                                                                                 |
| <b>Safety outcomes</b>          |                                                                                                                                                                |
| Acute ischemic stroke           | 433.xx-437.xx                                                                                                                                                  |
| Heart failure                   | 428.xx                                                                                                                                                         |
| Acute myocardial infarction     | 410.xx                                                                                                                                                         |
| Diabetic neuropathy             | 250.6x, 357.2                                                                                                                                                  |
| Diabetic foot                   | 250.7x, 785.4 (gangrene)                                                                                                                                       |
| Dialysis                        | 585.xx                                                                                                                                                         |

| <b>Comorbidities</b>        |                                                                                                                                                              |
|-----------------------------|--------------------------------------------------------------------------------------------------------------------------------------------------------------|
| Hypertension                | 401.xx, 402.xx, 403.xx, 404.xx, 405.xx and any anti-hypertension drugs                                                                                       |
| Ischemic heart disease      | 410.xx-414.xx                                                                                                                                                |
| Chronic kidney disease      | 580.xx-589.xx, 403.xx-404.xx, 016.0x, 095.4x, 236.9x, 250.4x, 274.1x, 442.1x, 447.3x, 440.1x, 572.4x, 642.1x, 646.2x, 753.1x, 283.11, 403.01, 404.02, 446.21 |
| Diabetic neuropathy         | 250.6x, 357.2                                                                                                                                                |
| Diabetic foot ulcers        | 250.7x, 785.4 (gangrene)                                                                                                                                     |
| Peripheral arterial disease | 440.0x, 440.2x, 440.3x, 440.8x, 440.9x, 443.xx, 444.0x, 444.22, 444.8x, 447.8x, 447.9x                                                                       |
| Dialysis                    | 585.xx (with catastrophic illness card)                                                                                                                      |
| Ischemic stroke             | 433.xx-437.xx                                                                                                                                                |
| Heart failure               | 428.xx                                                                                                                                                       |

Abbreviation: DR, diabetic retinopathy; *ICD-9-CM: International Classification of Diseases, Ninth Revision, Clinical Modification.*

**eTable 2.** Anatomical Therapeutic Chemical (ATC) Codes of the Medications Used in This Study

| Medications                               | ATC codes                                                                                                                             |
|-------------------------------------------|---------------------------------------------------------------------------------------------------------------------------------------|
| <b>Study drugs</b>                        |                                                                                                                                       |
| Statin                                    | C10AA01, C10AA02, C10AA03, C10AA04, C10AA05, C10AA07, C10AA08, C10BA01, C10BA02                                                       |
| Rosuvastatin                              | C10AA07                                                                                                                               |
| Atorvastatin                              | C10AA05                                                                                                                               |
| Simvastatin                               | C10AA01, C10BA02                                                                                                                      |
| Fluvastatin                               | C10AA04                                                                                                                               |
| Pravastatin                               | C10AA03                                                                                                                               |
| Lovastatin                                | C10AA02, C10BA01,                                                                                                                     |
| Pitavastatin                              | C10AA08                                                                                                                               |
| <b>Diabetes medication</b>                |                                                                                                                                       |
| Insulin                                   | A10AB01, A10AB03, A10AB04, A10AB05, A10AB06, A10AB30, A10AC01, A10AC03, A10AC30, A10AD01, A10AD03, A10AD05, A10AE01, A10AE04, A10AE05 |
| Sulfonylurea                              | A10BB01, A10BB02, A10BB03, A10BB04, A10BB05, A10BB07, A10BB08, A10BB09, A10BB12, A10BB31                                              |
| Metformin                                 | A10BA02, A10BA03, A10BD, A10BD02, A10BD03, A10BD05, A10BD07, A10BD08, A10BD10, A10BD11, A10BD13, A10BX02                              |
| DPP4i                                     | A10BH01, A10BH02, A10BH03, A10BH04, A10BH05                                                                                           |
| Thiazolidinediones                        | A10BG02, A10BG03                                                                                                                      |
| Alpha-glucosidase inhibitors              | A10BF01, A10BF02                                                                                                                      |
| Meglitinides                              | A10BX08                                                                                                                               |
| <b>Hypertension medication</b>            |                                                                                                                                       |
| Calcium channel blocker (Dihydropyridine) | C08CA01, C08CA02, C08CA03, C08CA04, C08CA05, C08CA06, C08CA07, C08CA08, C08CA09, C08CA12, C08CA13, C08CA15                            |

|               |                                                                                                                                                                                                               |
|---------------|---------------------------------------------------------------------------------------------------------------------------------------------------------------------------------------------------------------|
| Beta blocker  | C07AA01, C07AA02, C07AA03, C07AA05, C07AA06, C07AA07, C07AA12, C07AA15, C07AA19, C07AB02, C07AB03, C07AB04, C07AB05, C07AB07, C07AB09, C07AB12, C07AG01, C07AG02, C07BA68, C07BB02, C07BB03, C07CA03, C07DA06 |
| ACEi          | C09AA01, C09AA03, C09AA02, C09AA09, C09AA05, C09AA04, C09BA04, C09AA06, C09AA08, C09AA07, C09BB05, C09BA01, C09AA16, C09BB, C09BA02                                                                           |
| ARB           | C09DA07, C09CA06, C09CA01, C09DA08, C09CA03, C09DA01, C09CA04, C09DA03, C09DB01, C09CA07, C09CA08, C09DA04, C09CA02, C09DA06, C09DX01, C09DX03, C09DB04, C09DB02, C09CA09                                     |
| Thiazide      | C03AA03, C03AA06, C03AA91, C03AA07                                                                                                                                                                            |
| Alpha blocker | C02CA91, C02CA01, C02CA04                                                                                                                                                                                     |

**eTable 3.** Demographic Information of the Study Population before Propensity Score Matching

| Variables                                      | Statin<br>( <i>n</i> = 199 760)<br>No. (%) | Non-Statin<br>( <i>n</i> = 19 599)<br>No. (%) | ASMD  |
|------------------------------------------------|--------------------------------------------|-----------------------------------------------|-------|
| Sex                                            |                                            |                                               |       |
| Male                                           | 97 376 (48.7)                              | 8747 (44.6)                                   | 0.083 |
| Female                                         | 102 384 (51.3)                             | 10 852 (55.4)                                 | 0.083 |
| Outpatient visit in previous year <sup>a</sup> | 22.9 ± 13.0                                | 15.2 ± 14.2                                   | 0.564 |
| Diabetes duration, y <sup>a</sup>              | 3.3 ± 3.7                                  | 2.7 ± 3.2                                     | 0.175 |
| Age (y) <sup>a</sup>                           | 60.6 ± 10.6                                | 61.0 ± 11.0                                   | 0.037 |
| Age ≥65 y                                      | 66 619 (33.3)                              | 7259 (37.0)                                   | 0.077 |
| Comorbidity                                    |                                            |                                               |       |
| Hypertension                                   | 114 805 (57.5)                             | 8217 (41.9)                                   | 0.315 |
| Ischemic heart disease                         | 31 688 (15.9)                              | 2451 (12.5)                                   | 0.096 |
| Chronic kidney disease                         | 15 369 (7.7)                               | 1162 (5.9)                                    | 0.070 |
| Diabetic neuropathy                            | 11 556 (5.8)                               | 914 (4.7)                                     | 0.050 |
| Diabetic foot                                  | 3337 (1.7)                                 | 328 (1.7)                                     | 0.000 |
| Peripheral arterial disease                    | 3102 (1.6)                                 | 279 (1.4)                                     | 0.011 |
| Dialysis                                       | 446 (0.2)                                  | 53 (0.3)                                      | 0.010 |
| History of event                               |                                            |                                               |       |
| Ischemic stroke                                | 16 491 (8.3)                               | 1734 (8.8)                                    | 0.021 |
| Heart failure                                  | 5367 (2.7)                                 | 624 (3.2)                                     | 0.029 |
| Amputation                                     | 767 (0.4)                                  | 77 (0.4)                                      | 0.001 |
| Diabetes medication                            |                                            |                                               |       |
| Insulin                                        | 19 405 (9.7)                               | 2328 (11.9)                                   | 0.070 |
| Sulfonylurea                                   | 149 310 (74.7)                             | 15 681 (80.0)                                 | 0.126 |
| Metformin                                      | 165 367 (82.8)                             | 14 519 (74.1)                                 | 0.213 |
| DPP4i                                          | 18 160 (9.1)                               | 536 (2.7)                                     | 0.272 |
| Thiazolidinediones                             | 37 384 (18.7)                              | 2065 (10.5)                                   | 0.233 |
| Alpha-glucosidase inhibitors                   | 32 217 (16.1)                              | 2100 (10.7)                                   | 0.159 |
| Meglitinides                                   | 19 242 (9.6)                               | 1696 (8.7)                                    | 0.034 |
| Hypertension medication                        |                                            |                                               |       |
| Calcium channel blocker                        | 93 406 (46.8)                              | 9021 (46.0)                                   | 0.015 |
| Beta blocker                                   | 81 765 (40.9)                              | 8304 (42.4)                                   | 0.029 |
| ACEi                                           | 61 985 (31.0)                              | 7374 (37.6)                                   | 0.139 |
| ARB                                            | 83 334 (41.7)                              | 5098 (26.0)                                   | 0.337 |

|                        |               |             |       |
|------------------------|---------------|-------------|-------|
| Thiazide               | 20 766 (10.4) | 2529 (12.9) | 0.078 |
| Alpha blocker          | 12 882 (6.4)  | 1489 (7.6)  | 0.045 |
| CCI score <sup>a</sup> | 1.8 ± 1.3     | 1.6 ± 1.5   | 0.130 |

Abbreviation: ACEi, angiotensin-converting enzyme inhibitor; ARB, angiotensin II receptor blocker; ASMD, absolute standardized mean difference; CCI, Charlson comorbidity index; DM, diabetes mellitus; DPP4i, dipeptidyl peptidase-4 inhibitors.

<sup>a</sup>Presented as mean ± standard deviation.

**eTable 4.** The Effect of Statin on Diabetic Retinopathy in Patients with Type 2 Diabetes Mellitus by Intensity

|                             | No.     | Event (%)   | HR (95% CI) <sup>a</sup> | <i>P</i> value <sup>b</sup> |
|-----------------------------|---------|-------------|--------------------------|-----------------------------|
| Intensity <sup>c</sup>      |         |             |                          |                             |
| Low                         | 41 160  | 5523 (13.4) | 1 (Reference)            |                             |
| Moderate                    | 140 002 | 8404 (6.0)  | 0.66 (0.64-0.68)         | <.001                       |
| High                        | 11 329  | 383 (3.4)   | 0.49 (0.44-0.54)         | <.001                       |
| <i>P</i> trend <sup>d</sup> |         |             |                          | <.001                       |

Abbreviations: CI, confidence interval; HR, hazard ratio; NA, not applicable.

<sup>a</sup> Estimated from a sub-distribution hazard model.

<sup>b</sup> The *P* values were derived from two separate models in the same column of the table, there were three *P* values at total in which 2 were from the first model and 1 was from the second model (the latter one was *P* trend).

<sup>c</sup> 26 868 patients were excluded because of a switch among low-intensity, moderate-intensity, and high-intensity statin.

<sup>d</sup> The intensity of statin was treated as a continuous variable in which the coding of low-, moderate-, and high-intensity was 1, 2, and 3 respectively.



**eFigure 1.** Cumulative Incidence of All Diabetic Retinopathy With Low-, Moderate-, and High-Intensity Statin Therapy

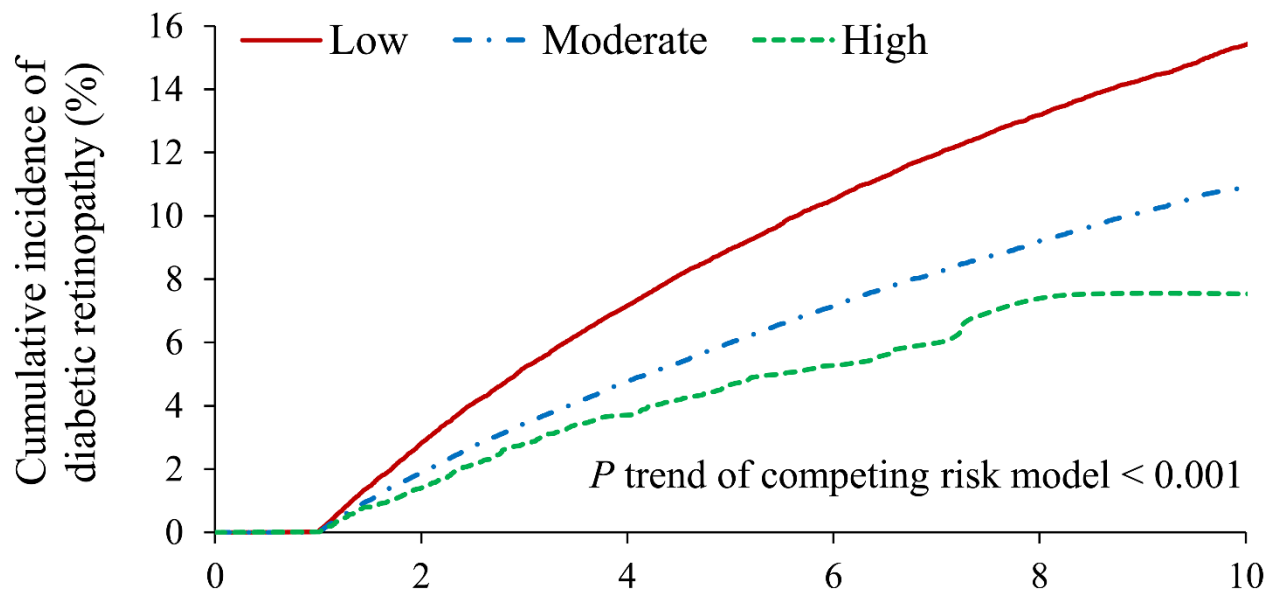

No. at risk:

|          | 0      | 2      | 4     | 6     | 8     | 10    |
|----------|--------|--------|-------|-------|-------|-------|
| Low      | 41160  | 38254  | 31180 | 24864 | 18996 | 11147 |
| Moderate | 140002 | 115684 | 76710 | 45915 | 22663 | 8985  |
| High     | 11329  | 8946   | 4546  | 1531  | 133   | 6     |

**eFigure 2.** Distribution of the Index date in the Statin and Nonstatin Groups After Propensity Score Matching

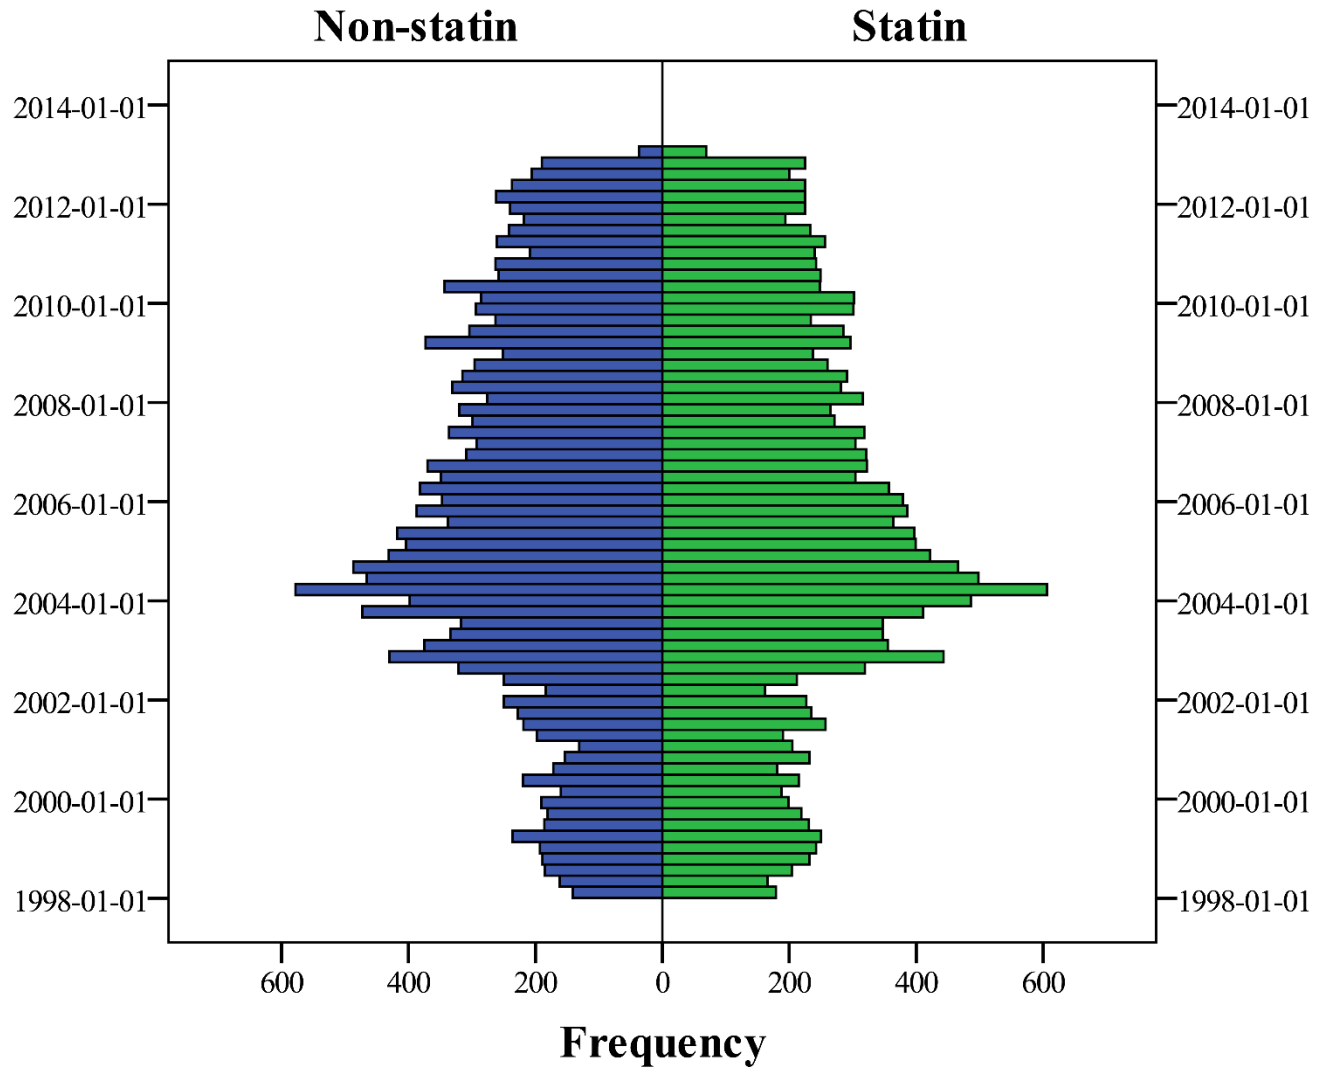

Supplement: jamaophthalmol-137-363-s001.pdf [file jamaophthalmol-137-363-s001.pdf]
